# Supplementary material
Source: Royal Society of Chemistry journal article supplement (doi:10.1039/d5bm01669j)
Supplement: d5bm01669j1.pdf [file d5bm01669j1.pdf]

### Supporting information For

Mechanistic Study on SIRT3/ROR $\gamma$ t/STAT3-Regulated Th17-Targeted Bionic Black Phosphorus Quantum Dot Cluster Nanozyme for Improving Sepsis-Associated Acute Kidney Injury

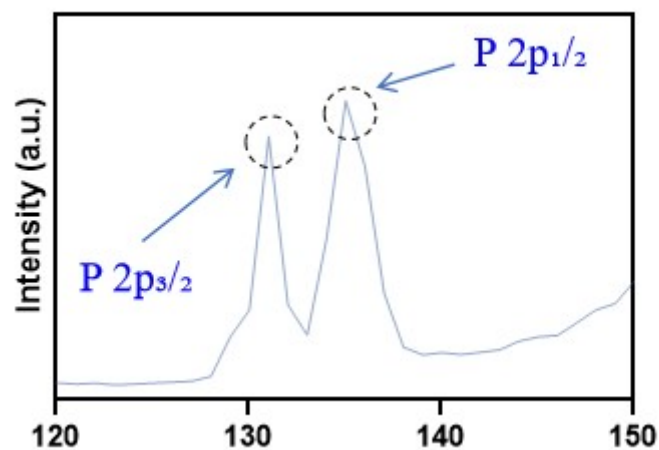

Figure S1. Characteristic Peaks of Fine Spectra of P-P Bond.

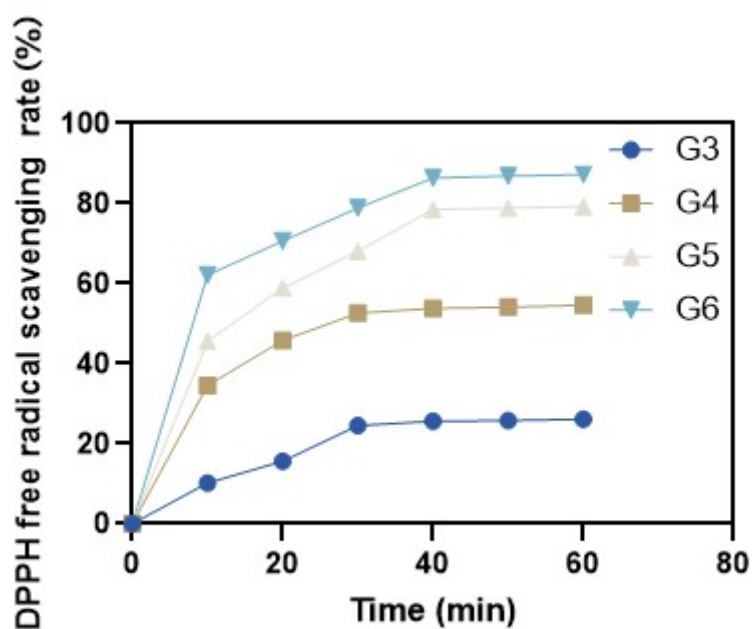

Figure S2. DPPH free radical scavenging rate experiment.

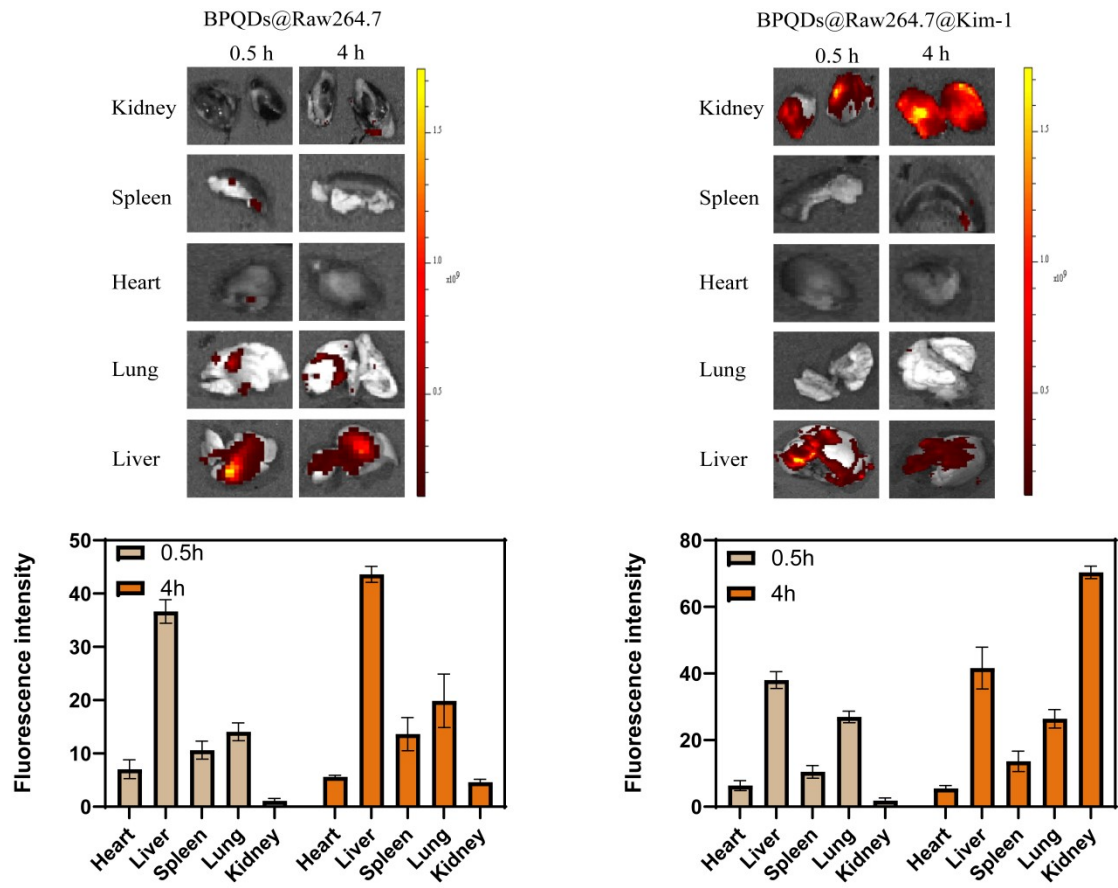

Figure S3 In Vivo Tissue Imaging.
