# Supplementary material
Source: Royal Society of Chemistry journal article supplement (doi:10.1039/d5bm01669j)
Supplement: d5bm01669j2.xlsx [file d5bm01669j2.xlsx]

## Sheet: XPS-P
X	Y
200.08	137442
199.08	130244
198.08	128691
197.08	129076
196.08	134482
195.08	159999
194.08	224268
193.08	280205
192.08	277588
191.08	214548
190.08	182051
189.08	249873
188.08	317727
187.08	215217
186.08	139502
185.08	118224
184.08	106791
183.08	98089
182.08	102457
181.08	93656.5
180.08	96413.3
179.08	98697.1
178.08	96657.6
177.08	98706.1
176.08	98677.8
175.08	100140
174.08	97997
173.08	106072
172.08	109355
171.08	100758
170.08	100068
169.08	101814
168.08	96717
167.08	93760.9
166.08	97754.7
165.08	96061.6
164.08	89863.4
163.08	92921.9
162.08	79628.2
161.08	93336.5
160.08	92120.6
159.08	91315.8
158.08	100523
157.08	88918.9
156.08	103541
155.08	103187
154.08	107013
153.08	112049
152.08	115085
151.08	126917
150.08	122381
149.08	99134.3
148.08	92622
147.08	79129.3
146.08	66329.4
145.08	64347.4
144.08	60159.4
143.08	51191.3
142.08	48423.2
141.08	46267.5
140.08	48219.4
139.08	45797.8
138.08	53677.6
137.08	109735
136.08	241573
135.08	310128
134.08	166597
133.08	66494.4
132.08	97714.8
131.08	273015
130.08	92404
129.08	64535.3
128.08	23594.4
127.08	18592.7
126.08	17372.9
125.08	16658.9
124.08	15409
123.08	14464.6
122.08	16400.2
121.08	15423.9
120.08	16774.8
119.08	17978.6
118.08	17982.1
117.08	16449.3
116.08	14147.9
115.08	15126.7
114.08	16285.6
113.08	15923.6
112.08	15717.6
111.08	15948.6
110.08	14161.4
109.08	17825.1
108.08	15999.3
107.08	16710.1
106.08	16679.1
105.08	15585.9
104.08	15460.3
103.08	17087.7
102.08	16447
101.08	16658.9
100.08	17002.3
